# Supplementary material
Source: Springer Nature journal article supplement (https://www.springerprofessional.de/resource/supplementary/13688_2019_182_MOESM2_ESM.csv/16461290)
Supplement: MOESM2 [file 16461290]

City	n Listings	Plants	Books	Wall Art	D�cor	Bright Colors	Region
Kinshasa, D.R.C.	12	0.33	0.17	0.5	0.25	0.25	Africa
Abidjan, Cote-d'Ivoire	107	0.39	0.09	0.84	0.31	0.07	Africa
Harare, Zimbabwe	115	0.44	0.17	1.2	0.46	0.09	Africa
Dar-es-Salaam, Tanzania	167	0.35	0.16	0.84	0.47	0.11	Africa
Lagos, Nigeria	175	0.23	0.16	0.93	0.4	0.11	Africa
Kampala, Uganda	201	0.29	0.16	1.14	0.32	0.09	Africa
Accra, Ghana	214	0.47	0.1	1.01	0.38	0.1	Africa
Johannesburg, South Africa	218	0.62	0.32	1.3	0.41	0.11	Africa
Cape-Town, South Africa	281	0.97	0.35	1.56	0.36	0.1	Africa
Trinidad and Tobago	84	0.6	0.11	1.12	0.49	0.13	Caribbean
Port-au-Prince, Haiti	87	0.47	0.14	1.03	0.43	0.06	Caribbean
Bahamas	190	0.5	0.18	1.21	0.43	0.09	Caribbean
Havana, Cuba	235	0.97	0.12	1.73	0.7	0.17	Caribbean
Samara, Russia	21	0.62	0	0.48	0.1	0.1	Russia and East Asia
Omsk, Russia	21	0.38	0.1	0.95	0.38	0.1	Russia and East Asia
Novosibirsk, Russia	39	0.51	0.13	0.54	0.23	0.26	Russia and East Asia
Nizhny-Novgorod, Russia	55	0.75	0.15	1.13	0.27	0.24	Russia and East Asia
Yekaterinburg, Russia	65	0.63	0.14	0.86	0.46	0.22	Russia and East Asia
Seoul, South Korea	70	0.81	0.2	1	0.34	0.14	Russia and East Asia
Kyoto, Japan	132	0.41	0.16	0.73	0.38	0.28	Russia and East Asia
Osaka, Japan	136	0.71	0.14	0.87	0.26	0.3	Russia and East Asia
Hong Kong	139	0.52	0.2	0.94	0.52	0.19	Russia and East Asia
Shanghai, China	155	1.03	0.19	1.15	0.41	0.21	Russia and East Asia
Moscow, Russia	176	0.72	0.18	0.83	0.31	0.11	Russia and East Asia
Guangzhou, China	177	1.15	0.26	1.49	0.49	0.14	Russia and East Asia
Beijing, China	183	1.41	0.28	1.39	0.52	0.19	Russia and East Asia
Tokyo, Japan	184	0.73	0.22	0.82	0.38	0.26	Russia and East Asia
St. Petersburg, Russia	192	0.72	0.15	1.27	0.33	0.27	Russia and East Asia
Shenzhen, China	236	1.35	0.23	1.38	0.41	0.15	Russia and East Asia
Granada, Spain	162	0.83	0.27	1.67	0.56	0.23	Europe
Oxford, United-Kingdom	173	0.83	0.37	1.47	0.29	0.09	Europe
Liverpool, U.K.	175	0.68	0.24	1.51	0.35	0.19	Europe
Warsaw, Poland	184	0.93	0.27	0.82	0.34	0.15	Europe
Budapest, Hungary	184	0.84	0.26	1.14	0.32	0.24	Europe
Cologne, Germany	185	1.05	0.3	1.29	0.38	0.1	Europe
Geneva, Switzerland	190	0.88	0.26	1.22	0.27	0.15	Europe
London, U.K.	197	0.8	0.27	1.19	0.29	0.17	Europe
Naples, Italy	200	0.83	0.34	1.89	0.65	0.23	Europe
Stockholm, Sweden	205	1.52	0.28	1.51	0.23	0.16	Europe
Rome, Italy	209	0.7	0.32	1.7	0.44	0.17	Europe
Porto, Portugal	210	0.95	0.25	1.14	0.39	0.22	Europe
Vienna, Austria	216	1.08	0.31	1.23	0.39	0.14	Europe
Helsinki, Finland	226	1.14	0.28	1.29	0.38	0.12	Europe
Milan, Italy	230	0.82	0.42	1.9	0.48	0.18	Europe
Madrid, Spain	231	0.9	0.3	1.45	0.6	0.16	Europe
Berlin, Germany	232	1.14	0.27	1.13	0.34	0.1	Europe
Copenhagen, Denmark	237	1.26	0.28	1.3	0.35	0.09	Europe
Paris, France	237	1.05	0.39	1.46	0.37	0.18	Europe
Manchester, U.K.	244	0.86	0.26	1.39	0.45	0.17	Europe
Amsterdam, Netherlands	247	1.07	0.25	1.09	0.33	0.11	Europe
Oslo, Norway	257	1.3	0.27	1.44	0.3	0.1	Europe
Athens, Greece	266	0.67	0.38	1.6	0.53	0.29	Europe
Barcelona, Spain	281	1.09	0.29	1.34	0.45	0.16	Europe
Algiers, Algeria	14	0.57	0.14	1.07	0.21	0.14	Middle East / North Africa
Riyadh, Saudi-Arabia	17	0.53	0.06	0.65	0.12	0.29	Middle East / North Africa
Mecca, Saudi-Arabia	18	0.5	0.06	0.67	0.22	0.17	Middle East / North Africa
Tangier, Morocco	173	0.61	0.24	1.47	0.63	0.16	Middle East / North Africa
Istanbul, Turkey	233	0.66	0.33	1.21	0.51	0.17	Middle East / North Africa
Cairo, Egypt	240	0.48	0.13	1.12	0.38	0.2	Middle East / North Africa
Marrakesh, Morocco	252	1.07	0.22	1.49	0.57	0.43	Middle East / North Africa
Dubai, U.A.E.	265	0.66	0.12	1.06	0.29	0.14	Middle East / North Africa
Tel-Aviv, Israel	329	0.97	0.3	1.33	0.4	0.11	Middle East / North Africa
Quebec City, Canada	189	0.78	0.22	1.02	0.28	0.14	North America
Houston, U.S.	214	0.56	0.27	1.4	0.34	0.09	North America
Honolulu, U.S.	234	0.61	0.25	1.15	0.26	0.13	North America
Mexico-City, Mexico	239	1.4	0.34	1.43	0.57	0.21	North America
Tijuana, Mexico	241	0.84	0.22	1.45	0.44	0.15	North America
Washington, U.S.	253	0.77	0.35	1.47	0.43	0.15	North America
Toronto, Canada	258	0.87	0.29	1.28	0.3	0.11	North America
Chicago, U.S.	268	0.84	0.39	1.65	0.35	0.21	North America
Vancouver, Canada	270	0.81	0.2	1.28	0.27	0.12	North America
Los Angeles, U.S.	273	0.91	0.31	1.53	0.42	0.2	North America
Charleston, U.S.	275	0.74	0.37	1.76	0.57	0.16	North America
Pittsburgh, U.S.	277	0.67	0.27	1.43	0.34	0.14	North America
New-York, U.S.	282	0.61	0.28	1.32	0.4	0.19	North America
San Francisco, U.S.	282	0.96	0.37	1.7	0.39	0.15	North America
Cancun, Mexico	283	0.89	0.16	1.09	0.45	0.18	North America
Miami, U.S.	291	0.66	0.24	1.43	0.36	0.14	North America
Montreal, Canada	294	1.07	0.3	1.38	0.32	0.16	North America
Boston, U.S.	313	0.78	0.32	1.5	0.38	0.19	North America
Apia, Samoa	14	0.29	0.21	0.64	0.36	0.14	Oceania
Fiji	85	0.49	0.12	0.82	0.26	0.05	Oceania
Auckland, New Zealand	280	0.61	0.28	1.14	0.25	0.1	Oceania
Sydney, Australia	299	0.84	0.28	1.16	0.35	0.15	Oceania
Melbourne, Australia	301	0.89	0.23	0.9	0.23	0.11	Oceania
Yangon, Burma	94	0.63	0.29	0.79	0.24	0.18	Southeast Asia
Dhaka, Bangladesh	106	0.28	0.16	0.8	0.33	0.1	Southeast Asia
Kolkata, India	201	0.57	0.3	1.78	0.56	0.26	Southeast Asia
Phnom-Penh, Cambodia	202	1.09	0.22	1	0.38	0.16	Southeast Asia
Jakarta, Indonesia	231	0.62	0.16	0.9	0.28	0.14	Southeast Asia
Ho-Chi-Minh-City, Vietnam	237	1.22	0.22	1.15	0.43	0.11	Southeast Asia
Singapore	250	0.77	0.23	0.95	0.38	0.09	Southeast Asia
Bali, Indonesia	250	0.77	0.15	0.89	0.45	0.23	Southeast Asia
Manila, Philippines	256	0.64	0.12	1.07	0.42	0.13	Southeast Asia
Bangkok, Thailand	263	0.79	0.16	0.9	0.29	0.14	Southeast Asia
Bangalore, India	270	0.63	0.31	1.29	0.52	0.36	Southeast Asia
Delhi, India	277	0.69	0.25	1.98	0.64	0.33	Southeast Asia
Kuala-Lumpur, Malaysia	279	0.58	0.2	0.73	0.37	0.25	Southeast Asia
Mumbai, India	290	0.62	0.22	1.51	0.55	0.17	Southeast Asia
Caracas, Venezuela	121	0.49	0.21	1.12	0.25	0.07	South America
Buenos Aires, Argentina	198	0.82	0.41	1.38	0.3	0.29	South America
Lima, Peru	217	1	0.23	1.25	0.41	0.18	South America
Rio de Janeiro, Brazil	234	0.83	0.37	1.79	0.43	0.2	South America
Quito, Ecuador	236	0.7	0.19	1.3	0.49	0.19	South America
Santiago, Chile	238	0.97	0.27	1.22	0.37	0.15	South America
Sao Paulo, Brazil	254	0.92	0.39	1.81	0.46	0.2	South America
Bogota, Colombia	338	0.88	0.28	1.24	0.37	0.14	South America
